# Supplementary material
Source: PubMed Central journal article supplement (PMC7756234)
Supplement: jama-e2023138-s004.pdf [file jama-e2023138-s004.pdf]

## Data Sharing Statement

Kotecha. Effect of Digoxin vs Bisoprolol for Heart Rate Control in Atrial Fibrillation on Patient-Reported Quality of Life. *JAMA*. Published December 22, 2020. doi:10.1001/jama.2020.23138

### Data

**Data available:** No

### Additional Information

**Explanation for why data not available:** As per the funder's position on sharing of research data, all requests for data should be directed to the Sponsor via the corresponding author. Data access requests from a third party will be managed following the relevant policies and practices of the institution hosting the research, which are expected to be transparent, robust, fair and demonstrate that appropriate mechanisms are in place to provide assurances as to the integrity of the research data. Release of data will be subject to a data use agreement between the institution and the third party requesting the data, which should detail the agreed use and appropriate management of the research data to be shared and include a requirement for recognition of the contribution of the researchers who generated the data and the original funder (UK National Institute for Health Research; policies available at [www.nihr.ac.uk](http://www.nihr.ac.uk)).
